# Supplementary material for: Functional connectivity in Parkinson’s disease candidates for deep brain stimulation
Source: PubMed Central journal article supplement (PMC8748462; doi:10.1038/s41531-021-00268-6), 2022-01-10

**Supplementary Table 1:** Cognitive and behavioral characteristics of Parkinson's disease patients and healthy controls at the study entry and their changes over time.

| Variables                  | HC                           | Candidates for DBS           | Non-candidates               | p: Candidates for DBS vs HC | p: Non-candidates vs HC | p: Candidates for DBS vs Non-candidates | p: for linear trend Candidates for DBS | p: for linear trend Non-candidates | p: for differential trend Candidates for DBS vs Non-candidates |
|----------------------------|------------------------------|------------------------------|------------------------------|-----------------------------|-------------------------|-----------------------------------------|----------------------------------------|------------------------------------|----------------------------------------------------------------|
| <b>Global cognition</b>    |                              |                              |                              |                             |                         |                                         |                                        |                                    |                                                                |
| ACE-R total                | 96.28±3.00<br>(87.00-100.00) | 87.42±8.22<br>(69.00-99.00)  | 89.37±7.42<br>(65.00-99.00)  | < 0.001                     | < 0.001                 | 0.37                                    | < 0.001                                | <0.01                              | 0.13                                                           |
| <b>Memory</b>              |                              |                              |                              |                             |                         |                                         |                                        |                                    |                                                                |
| RAVLT immediate recall     | 45.36±10.24<br>(21.00-65.00) | 37.89±10.50<br>(24.00-59.00) | 38.22±11.31<br>(17-66.00)    | 0.048                       | 0.004                   | 1.00                                    | 0.01                                   | 1.00                               | 0.11                                                           |
| RAVLT delayed recall       | 8.92±2.74<br>(4.00-13.00)    | 12.53±2.56<br>(6.00-15.00)   | 12.37±3.16<br>(0.00-15.00)   | 0.044                       | 0.003                   | 1.00                                    | 0.01                                   | 0.62                               | 0.31                                                           |
| PRM [% correct]            | 79.69±11.46<br>(37.50-95.83) | 74.94±11.26<br>(50.00-96.00) | 74.48±18.24<br>(0.00-100.00) | 1.00                        | 0.26                    | 1.00                                    | 1.00                                   | 1.00                               | 1.00                                                           |
| SRM [% correct]            | 73.88±10.52<br>(55.00-95.00) | 67.63±13.47<br>(40.00-90.00) | 70.12±16.18<br>(0.00-85.00)  | 0.35                        | 0.49                    | 1.00                                    | 0.001                                  | 0.81                               | 0.73                                                           |
| <b>Language</b>            |                              |                              |                              |                             |                         |                                         |                                        |                                    |                                                                |
| BNT total                  | 58.22±1.63<br>(53.00-60.00)  | 54.26±5.08<br>(42.00-59.00)  | 55.44±8.97<br>(5.00-60.00)   | 0.048                       | 0.08                    | 1.00                                    | 0.29                                   | 0.66                               | 0.33                                                           |
| ACE-R language             | 25.90±0.30<br>(25.00-26.00)  | 22.74±2.62<br>(18.00-27.00)  | 24.15±2.57<br>(14.00-26.00)  | < 0.001                     | < 0.001                 | 0.01                                    | 1.00                                   | 1.00                               | 1.00                                                           |
| <b>Executive functions</b> |                              |                              |                              |                             |                         |                                         |                                        |                                    |                                                                |
| Digit span backward        | 6.80±1.95<br>(3.00-11.00)    | 5.78±3.02<br>(2.00-11.00)    | 5.54±1.96<br>(0.00-11.00)    | 0.04                        | 0.12                    | 1.00                                    | 0.001                                  | 0.004                              | 0.31                                                           |

|                                     |                              |                              |                               |         |         |      |         |         |       |
|-------------------------------------|------------------------------|------------------------------|-------------------------------|---------|---------|------|---------|---------|-------|
| Stroop interference [total correct] | 38.24±10.34<br>(17.00-60.00) | 34.53±12.41<br>(14.00-55.00) | 32.61±11.60<br>(13.00-68.00)  | 0.42    | 0.23    | 1.00 | < 0.001 | < 0.001 | 0.06  |
| IED [total errors]                  | 41.64±28.99<br>(7.00-146.00) | 53.26±31.70<br>(0.00-161.00) | 59.32±38.95<br>(11.00-225.00) | 0.69    | 0.46    | 1.00 | < 0.001 | 0.01    | 0.33  |
| <b>Attention</b>                    |                              |                              |                               |         |         |      |         |         |       |
| Digit ordering [max. span]          | 5.77±1.24<br>(4.00-8.00)     | 5.02±1.02<br>(3.00-6.50)     | 5.23±1.13<br>(3.50-8.50)      | 0.04    | 0.13    | 1.00 | 0.01    | 0.01    | 0.35  |
| Letter cancelation correct          | 28.44±5.53<br>(20.00-41.00)  | 23.58±6.65<br>(15.00-37.00)  | 22.43±5.70<br>(0.00-39.00)    | 0.04    | <0.001  | 1.00 | < 0.001 | <0.001  | 0.004 |
| <b>Visuospatial abilities</b>       |                              |                              |                               |         |         |      |         |         |       |
| Hooper                              | 23.12±3.34<br>(13.00-30.00)  | 18.95±6.24<br>(9.50-29.00)   | 19.17±5.69<br>(9.00-30.00)    | 0.003   | 0.001   | 1.00 | 0.01    | 0.10    | 0.09  |
| ACE-R visuospatial                  | 15.80±0.40<br>(15.00-16.00)  | 15.68±0.58<br>(14.00-16.00)  | 15.22±1.12<br>(12.00-16.00)   | 1.00    | 0.40    | 0.18 | 0.01    | < 0.001 | 0.24  |
| <b>Mood/behavior</b>                |                              |                              |                               |         |         |      |         |         |       |
| HDRS                                | 2.30±3.63<br>(0.00-15.00)    | 6.42±5.77<br>(0.00-20.00)    | 4.88±5.05<br>(0.00-18.00)     | 0.01    | 0.03    | 1.00 | < 0.001 | < 0.001 | 0.98  |
| HAMA                                | 2.92±3.06<br>(0.00-11.00)    | 6.05±4.89<br>(0.00-16.00)    | 5.17±5.75<br>(0.00-21.00)     | 0.03    | 0.08    | 1.00 | 0.01    | < 0.001 | 0.99  |
| Apathy scale                        | 1.74±2.90<br>(0.00-11.00)    | 11.26±9.93<br>(0.00-28.00)   | 10.15±7.68<br>(0.00-28.00)    | < 0.001 | < 0.001 | 1.00 | < 0.001 | 0.003   | 0.51  |

Values are reported as mean ± standard deviation (range). Differences between Parkinson's disease patients and healthy controls and between Parkinson's disease groups at baseline were assessed using ANOVA models. Test for linear trend was estimated in both Parkinson's disease groups and group-by-time interaction was assessed to evaluate longitudinal between-group differences. P values were adjusted for multiple comparisons at  $p < 0.05$ . Abbreviations: ACE-R=Addenbrooke's Cognitive Examination-Revised; BNT=Boston Naming Test; DBS=Deep Brain Stimulation; Candidates for DBS=Patients eligible for DBS; HAMA=Hamilton Anxiety Rating Scale; HC=healthy controls; HDRS=Hamilton Depression Rating Scale; IED=Intra and Extra-Dimensional shifting; Non-candidates=Patients not eligible for DBS; PD=Parkinson's disease; PRM=Pattern Recognition Memory; RAVLT=Rey Auditory Verbal Learning Test; SRM=Spatial Recognition Memory.

**Supplementary Table 2:** Affected functional connection values obtained from regional analysis at baseline in patients eligible or not for DBS.

| <b>Candidates for DBS &gt; Non-candidates</b> |                              |                            |                |
|-----------------------------------------------|------------------------------|----------------------------|----------------|
| <b>Connections</b>                            | <b>FC Candidates for DBS</b> | <b>FC Non-candidates</b>   | <b>P value</b> |
| L amygdala - L hippocampus                    | 0.47 ± 0.23<br>(0.23-1.16)   | 0.33 ± 0.24<br>(0.20-0.96) | 0.04           |
| R insula - R amygdala                         | 0.34 ± 0.17<br>(0.13-0.62)   | 0.23 ± 0.17<br>(0.01-0.59) | 0.03           |
| L superior temporal - L bankssts              | 0.70 ± 0.29<br>(0.18-1.31)   | 0.50 ± 0.26<br>(0.04-1.20) | 0.01           |
| L pericalcarine - L cuneus                    | 0.71 ± 0.26<br>(0.31-1.13)   | 0.54 ± 0.25<br>(0.09-1.05) | 0.02           |
| L superior parietal - L cuneus                | 0.66 ± 0.31<br>(0.18-1.34)   | 0.48 ± 0.21<br>(0.13-0.97) | 0.01           |
| R lingual - L cuneus                          | 0.77 ± 0.29<br>(0.16-1.18)   | 0.58 ± 0.25<br>(0.04-1.09) | 0.01           |
| R pericalcarine - L cuneus                    | 0.72 ± 0.23<br>(0.21-1.09)   | 0.53 ± 0.25<br>(0.11-1.11) | 0.01           |
| L lateral occipital - L inferior temporal     | 0.43 ± 0.26<br>(0.03-0.91)   | 0.29 ± 0.20<br>(0.01-0.70) | 0.03           |
| L amygdala - L medial orbitofrontal           | 0.31 ± 0.20<br>(0.10-0.82)   | 0.18 ± 0.14<br>(0.19-0.64) | 0.01           |
| L superior temporal - L middle temporal       | 0.62 ± 0.25<br>(0.17-1.10)   | 0.48 ± 0.23<br>(0.09-0.87) | 0.03           |
| R cuneus - L pericalcarine                    | 0.63 ± 0.30<br>(0.07-1.17)   | 0.47 ± 0.23<br>(0.03-0.93) | 0.03           |
| L precentral - L posterior cingulate          | 0.42 ± 0.23<br>(0.13-1.06)   | 0.27 ± 0.19<br>(0.01-0.89) | 0.02           |
| L transverse temporal - L superior temporal   | 0.80 ± 0.37<br>(0.17-1.78)   | 0.54 ± 0.31<br>(0.04-1.45) | 0.01           |
| R lingual - R cuneus                          | 0.82 ± 0.27<br>(0.27-1.19)   | 0.49 ± 0.25<br>(0.01-1.19) | <0.001         |
| R pericalcarine - R cuneus                    | 0.74 ± 0.28<br>(0.06-1.13)   | 0.53 ± 0.24<br>(0.01-1.10) | 0.005          |
| R lateral orbitofrontal - R entorhinal        | 0.38 ± 0.27<br>(0.01-0.81)   | 0.25 ± 0.14<br>(0.02-0.63) | 0.04           |
| R pallidum R putamen                          | 0.44 ± 0.23<br>(0.23-1.16)   | 0.32 ± 0.24<br>(0.20-0.96) | 0.04           |
| R inferior temporal - R fusiform              | 1.13 ± 0.38<br>(0.43-1.83)   | 0.89 ± 0.34<br>(0.04-1.83) | 0.01           |
| R lateral occipital - R inferior temporal     | 0.42 ± 0.18<br>(0.09-0.75)   | 0.25 ± 0.14<br>(0.03-0.66) | 0.001          |
| R pericalcarine - R lateral occipital         | 0.52 ± 0.22<br>(0.17-1.07)   | 0.41 ± 0.21<br>(0.02-0.80) | 0.04           |
| R middle temporal - R lateral orbitofrontal   | 0.77 ± 0.33<br>(0.17-1.31)   | 0.54 ± 0.26<br>(0.07-1.14) | 0.01           |
| R superior parietal - R lingual               | 0.61 ± 0.20<br>(0.28-0.88)   | 0.39 ± 0.30<br>(0.03-1.43) | 0.01           |
| R insula - R medial orbitofrontal             | 0.31 ± 0.16<br>(0.06-0.69)   | 0.10 ± 0.12<br>(0.01-0.43) | 0.01           |

|                                                     |                                      |                                   |                |
|-----------------------------------------------------|--------------------------------------|-----------------------------------|----------------|
| R superior parietal - R pericalcarine               | 0.50 ± 0.25<br>(0.11-0.93)           | 0.31 ± 0.21<br>(0.01-0.82)        | 0.005          |
| <b>Candidates for DBS &lt; Non-candidates</b>       |                                      |                                   |                |
| <b>Connections</b>                                  | <b>FC<br/>Candidates<br/>for DBS</b> | <b>FC<br/>Non-<br/>candidates</b> | <b>P value</b> |
| R superior frontal - L thalamus                     | 0.18 ± 0.12<br>(0.01-0.30)           | 0.09 ± 0.09<br>(0.02-0.58)        | 0.04           |
| L superior frontal - L caudate                      | 0.21 ± 0.13<br>(0.01-0.30)           | 0.07 ± 0.10<br>(0.02-0.48)        | 0.01           |
| R postcentral - R thalamus                          | 0.21 ± 0.11<br>(0.03-0.13)           | 0.08 ± 0.04<br>(0.07-0.49)        | 0.03           |
| R superior frontal - R caudate                      | 0.23 ± 0.13<br>(0.01-0.28)           | 0.08 ± 0.06<br>(0.03-0.49)        | 0.003          |
| R postcentral - R putamen                           | 0.31 ± 0.09<br>(0.01-0.35)           | 0.15 ± 0.10<br>(0.19-0.50)        | < 0.001        |
| L frontal pole - L caudal anterior cingulate cortex | 0.18 ± 0.13<br>(0.01-0.10)           | 0.05 ± 0.03<br>(0.02-0.43)        | 0.04           |
| L frontal pole - L medial orbitofrontal             | 0.37 ± 0.18<br>(0.04-0.64)           | 0.24 ± 0.18<br>(0.05-0.75)        | 0.02           |
| L pars orbitalis - rostral middle frontal           | 0.39 ± 0.25<br>(0.01-0.44)           | 0.22 ± 0.11<br>(0.01-0.99)        | 0.01           |

Values are reported as mean ± standard deviation (range). Differences between PD subgroups were assessed using age- and sex-adjusted ANOVA models, followed by post-hoc pairwise comparisons, Bonferroni-corrected for multiple comparisons ( $p < 0.05$ ). Abbreviations: DBS=Deep Brain Stimulation; Candidates for DBS=Patients eligible for DBS; FC=Functional Connectivity; L=Left; Non-candidates=Patients not eligible for DBS; PD=Parkinson's Disease; R=Right.

**Supplementary Table 3:** Functional connectivity changes over time in patients eligible or not for DBS.

| Pattern of progression                                | Lobes               | Node 1              | Node 2              |
|-------------------------------------------------------|---------------------|---------------------|---------------------|
| <b>1) Different trend of changes between subtypes</b> |                     |                     |                     |
| <b>Non-candidates →<br/>Candidates for DBS ↓</b>      | Occipital-Occipital | R cuneus            | R lingual           |
|                                                       |                     | L lingual           | R lingual           |
|                                                       |                     | L cuneus            | L lingual           |
|                                                       |                     | L lingual           | L pericalcarine     |
|                                                       |                     | R lingual           | L cuneus            |
|                                                       |                     | L cuneus            | R pericalcarine     |
|                                                       |                     | R cuneus            | R pericalcarine     |
|                                                       |                     | R lateral occipital | R pericalcarine     |
|                                                       |                     | R lingual           | R pericalcarine     |
|                                                       | Parietal-Occipital  | L superior parietal | L lateral occipital |
|                                                       |                     | L superior parietal | L cuneus            |
|                                                       |                     | L superior parietal | R lateral occipital |
|                                                       |                     | L superior parietal | L pericalcarine     |
|                                                       |                     | R precuneus         | R lingual           |
|                                                       |                     | R superior parietal | L lateral occipital |
| R superior parietal                                   |                     | R cuneus            |                     |
| R superior parietal                                   | R lingual           |                     |                     |

|                                                  |                                 |                         |                         |
|--------------------------------------------------|---------------------------------|-------------------------|-------------------------|
|                                                  | Temporal-Parietal               | L superior temporal     | R hippocampus           |
|                                                  |                                 | L isthmus               | L superior parietal     |
|                                                  |                                 | R isthmus               | R superior parietal     |
|                                                  | Temporal-Occipital              | R fusiform              | R lateral occipital     |
|                                                  | Temporal-Temporal               | L superior temporal     | L bankssts              |
|                                                  |                                 | L middle temporal       | L superior temporal     |
|                                                  |                                 | R fusiform              | R inferior temporal     |
|                                                  | Basal ganglia-Temporal          | L pallidum              | L entorhinal            |
|                                                  | Basal ganglia-Basal ganglia     | L pallidum              | L caudate               |
|                                                  |                                 | L pallidum              | L accumbens             |
|                                                  | Frontal insular-Frontal insular | L superior frontal      | L caudal middle frontal |
|                                                  | Frontal insular-Sensorimotor    | L superior frontal      | L precentral            |
|                                                  |                                 | R superior frontal      | R precentral            |
| Parietal-Frontal insular                         | L posterior cingulate           | L superior frontal      |                         |
| <b>Non-candidates →<br/>Candidates for DBS ↑</b> | Basal ganglia-Sensorimotor      | R caudate               | R postcentral           |
|                                                  |                                 | R putamen               | R postcentral           |
|                                                  |                                 | L caudate               | L postcentral           |
|                                                  | Basal ganglia-Frontal insular   | L caudate               | L superior frontal      |
|                                                  |                                 | R accumbens             | R insula                |
|                                                  | Frontal insular-Frontal insular | R lateral orbitofrontal | R pars triangularis     |
|                                                  | Basal ganglia-Occipital         | R putamen               | R lateral occipital     |

|                                                                                                          |                                 |                          |                             |
|----------------------------------------------------------------------------------------------------------|---------------------------------|--------------------------|-----------------------------|
|                                                                                                          | Basal ganglia-Temporal          | L thalamus               | L hippocampus               |
| <b>Non-candidates</b> ↑<br><b>Candidates for DBS</b> ↓                                                   | Occipital-Temporal              | L lateral occipital      | R inferior temporal         |
|                                                                                                          | Occipital-Parietal              | L cuneus                 | R superior parietal         |
|                                                                                                          | Frontal insular-Frontal insular | L pars opercularis       | L rostral middle frontal    |
| <b>Non-candidates</b> ↑<br><b>Candidates for DBS</b> →                                                   | Occipital-Temporal              | R lateral occipital      | R middle temporal           |
|                                                                                                          | Temporal-Temporal               | L middle temporal        | R inferior temporal         |
|                                                                                                          |                                 | R hippocampus            | R fusiform                  |
|                                                                                                          | Temporal-Parietal               | R bankssts               | R inferior parietal         |
|                                                                                                          | Frontal insular-Frontal insular | L rostral middle frontal | R caudal anterior cingulate |
|                                                                                                          |                                 | L superior frontal       | R rostral middle frontal    |
| Parietal-Parietal                                                                                        | L posterior cingulate           | R posterior cingulate    |                             |
| <b>2) Similar trend of changes (increase or decrease). with or without difference between the groups</b> |                                 |                          |                             |
| <b>Non-candidates</b> ↓<br><b>Candidates for DBS</b> ↓                                                   | Occipital-Parietal              | L lingual                | L precuneus                 |
|                                                                                                          | Parietal-Parietal               | R precuneus              | L precuneus                 |
|                                                                                                          | Temporal-Frontal insular        | R amygdala               | R insula                    |
|                                                                                                          | Temporal-Temporal               | R inferior temporal      | R temporal pole             |
|                                                                                                          |                                 | L isthmus                | R isthmus                   |
|                                                                                                          | Frontal insular-Frontal insular | L superior frontal       | R superior frontal          |
|                                                                                                          |                                 | L rostral middle frontal | R rostral middle frontal    |
|                                                                                                          | Sensorimotor-Sensorimotor       | L precentral             | R precentral                |
| L post central                                                                                           |                                 | R precentral             |                             |

|                                                                                             |                                 |                          |                             |
|---------------------------------------------------------------------------------------------|---------------------------------|--------------------------|-----------------------------|
| <b>Non-candidates</b> ↑<br><b>Candidates for DBS</b> ↑                                      | Temporal-Frontal insular        | R temporal pole          | R insula                    |
|                                                                                             | Basal ganglia-Temporal          | R thalamus               | R entorhinal                |
| <b>3) Different but stable functional connectivity values over time in the two subtypes</b> |                                 |                          |                             |
| <b>Non-candidates</b> →<br><b>Candidates for DBS</b> →                                      | Frontal insular-Temporal        | R rostral middle frontal | R superior temporal         |
|                                                                                             |                                 | R medial orbitofrontal   | R superior temporal         |
|                                                                                             |                                 | L medial orbitofrontal   | L amygdala                  |
|                                                                                             |                                 | L insula                 | L entorhinal                |
|                                                                                             | Frontal insular-Frontal insular | L frontal pole           | L caudal anterior cingulate |
|                                                                                             |                                 | L pars orbitalis         | L rostral middle frontal    |
|                                                                                             |                                 | L lateral orbitofrontal  | L rostral middle frontal    |
|                                                                                             |                                 | R medial orbitofrontal   | R insula                    |
|                                                                                             | Parietal-Temporal               | R superior parietal      | R amygdala                  |
|                                                                                             | Temporal-Temporal               | L superior temporal      | L transverse temporal       |
|                                                                                             |                                 | L bankssts               | L middle temporal           |

Legend: →: stable functional connectivity overtime; ↑: increased functional connectivity overtime; ↓: decreased functional connectivity overtime. Linear mixed-effects models were implemented in NBS to investigate functional connectivity changes over time at  $p < 0.05$ , Bonferroni-corrected for multiple comparisons. The effects of age, sex, LEDD at baseline, LEDD changes and individual follow-up duration were considered in the regression models. Abbreviations: DBS=Deep Brain Stimulation; Candidates for DBS=Patients eligible for DBS; L=Left; NBS=Network-based Statistics; Non-candidates=Patients not eligible for DBS; PD=Parkinson's disease; R=Right.



**Supplementary Table 4:** Significant correlations between functional network measures at baseline and clinical data at study entry and at each follow-up in patients eligible or not to DBS.

| <b>fMRI measure</b>                   | <b>Candidates for DBS clinical data (baseline)</b> | <b>r</b> | <b>p</b> |
|---------------------------------------|----------------------------------------------------|----------|----------|
| R lateral occipital - R pericalcarine | Tremor                                             | 0.80     | < 0.001  |
|                                       |                                                    |          |          |
| <b>fMRI measure</b>                   | <b>Non-candidates clinical data (baseline)</b>     | <b>r</b> | <b>p</b> |
| R pericalcarine - R lingual           | HY                                                 | 0.55     | < 0.001  |
|                                       |                                                    |          |          |
| <b>fMRI measure</b>                   | <b>Candidates for DBS clinical data (12 M)</b>     | <b>r</b> | <b>p</b> |
| L amygdala - L hippocampus            | Dyskinesia                                         | 0.84     | < 0.001  |
| L amygdala - L hippocampus            | UPDRS IV                                           | 0.76     | < 0.001  |
| R lateral occipital - R pericalcarine | Tremor                                             | 0.77     | 0.001    |
|                                       |                                                    |          |          |
| <b>fMRI measure</b>                   | <b>Non-candidates clinical data (12 M)</b>         | <b>r</b> | <b>p</b> |
| -                                     | -                                                  | -        | -        |
|                                       |                                                    |          |          |
| <b>fMRI measure</b>                   | <b>Candidates for DBS clinical data (24 M)</b>     | <b>r</b> | <b>p</b> |
| L amygdala - L hippocampus            | Dyskinesia                                         | 0.77     | < 0.001  |
| R lateral occipital - R pericalcarine | Tremor                                             | 0.75     | 0.002    |
|                                       |                                                    |          |          |
| <b>fMRI measure</b>                   | <b>Non-candidates clinical data (24 M)</b>         | <b>r</b> | <b>p</b> |

|                                       |                                                   |          |          |
|---------------------------------------|---------------------------------------------------|----------|----------|
| R pallidum - R putamen                | Bradykinesia                                      | -0.53    | < 0.001  |
| R pallidum - R putamen                | UPDRS III                                         | -0.49    | 0.002    |
| R pallidum - R putamen                | UPDRS IV                                          | -0.48    | 0.003    |
|                                       |                                                   |          |          |
| <b>fMRI measure</b>                   | <b>Candidates for DBS clinical data (36-48 M)</b> | <b>r</b> | <b>p</b> |
| R lateral occipital - R pericalcarine | Tremor                                            | 0.78     | 0.001    |
|                                       |                                                   |          |          |
| <b>fMRI measure</b>                   | <b>Non-candidates clinical data (36-48 M)</b>     | <b>r</b> | <b>p</b> |
| R cuneus - L pericalcarine            | HY                                                | 0.54     | 0.002    |

Partial correlations were assessed between fMRI measures at baseline and clinical data at study entry and at each follow-up using Pearson's correlation coefficient ( $r$ ) ( $p < 0.05$ ). Analysis was adjusted for age and sex, LEDD at baseline and LEDD changes (only at each follow-up). Correlation analyses were performed controlling for multiple comparisons using Bonferroni adjustment. Abbreviations: DBS=Deep Brain Stimulation; Candidates for DBS=Patients eligible for DBS; fMRI=functional MRI; HY=Hoehn & Yahr; L=Left; M=months; Non-candidates=Patients not eligible for DBS; PD=Parkinson's disease; R=Right; UPDRS=Unified Parkinson's Disease Rating Scale.

**Supplementary Table 5: Brain nodes included in the Network-based Statistical Analysis**

| N  | Node                        | N  | Node                         | N  | Node                         |
|----|-----------------------------|----|------------------------------|----|------------------------------|
| 1  | L thalamus                  | 37 | L precentral                 | 73 | R rostral anterior cingulate |
| 2  | L caudate                   | 38 | L precuneus                  | 74 | R rostral middle frontal     |
| 3  | L putamen                   | 39 | L rostral anterior cingulate | 75 | R superior frontal           |
| 4  | L pallidum                  | 40 | L rostral middle frontal     | 76 | R superior parietal          |
| 5  | L hippocampus               | 41 | L superior frontal           | 77 | R superior temporal          |
| 6  | L amygdala                  | 42 | L superior parietal          | 78 | R supramarginal              |
| 7  | L accumbens                 | 43 | L superior temporal          | 79 | R frontal pole               |
| 8  | R thalamus                  | 44 | L supramarginal              | 80 | R temporal pole              |
| 9  | R caudate                   | 45 | L frontal pole               | 81 | R transverse temporal        |
| 10 | R putamen                   | 46 | L temporal pole              | 82 | R insula                     |
| 11 | R pallidum                  | 47 | L transverse temporal        | 83 | Brainstem                    |
| 12 | R hippocampus               | 48 | L insula                     |    |                              |
| 13 | R amygdala                  | 49 | R bankssts                   |    |                              |
| 14 | R accumbens                 | 50 | R caudal anterior cingulate  |    |                              |
| 15 | L bankssts                  | 51 | R caudal middle frontal      |    |                              |
| 16 | L caudal anterior cingulate | 52 | R cuneus                     |    |                              |
| 17 | L caudal middle frontal     | 53 | R entorhinal                 |    |                              |
| 18 | L cuneus                    | 54 | R fusiform                   |    |                              |
| 19 | L entorhinal                | 55 | R inferior parietal          |    |                              |
| 20 | L fusiform                  | 56 | R inferior temporal          |    |                              |
| 21 | L inferior parietal         | 57 | R isthmus cingulate          |    |                              |
| 22 | L inferior temporal         | 58 | R lateral occipital          |    |                              |
| 23 | L isthmus cingulate         | 59 | R lateral orbitofrontal      |    |                              |
| 24 | L lateral occipital         | 60 | R lingual                    |    |                              |
| 25 | L lateral orbitofrontal     | 61 | R medial orbitofrontal       |    |                              |
| 26 | L lingual                   | 62 | R middle temporal            |    |                              |
| 27 | L medial orbitofrontal      | 63 | R parahippocampal            |    |                              |
| 28 | L middle temporal           | 64 | R paracentral                |    |                              |
| 29 | L parahippocampal           | 65 | R pars opercularis           |    |                              |
| 30 | L paracentral               | 66 | R pars orbitalis             |    |                              |
| 31 | L pars opercularis          | 67 | R pars triangularis          |    |                              |
| 32 | L pars orbitalis            | 68 | R pericalcarine              |    |                              |
| 33 | L pars triangularis         | 69 | R postcentral                |    |                              |
| 34 | L pericalcarine             | 70 | R posterior cingulate        |    |                              |
| 35 | L postcentral               | 71 | R precentral                 |    |                              |
| 36 | L posterior cingulate       | 72 | R precuneus                  |    |                              |

Abbreviations: L=Left, N=Number, R=Right.

**Supplementary Table 6:** Head motion parameters at study entry in PD groups and healthy controls (HC) and changes over time in PD patients.

| <b>Variables</b>                                 | <b>HC</b>                    | <b>Candidates for DBS</b>   | <b>Non-candidates</b>       | <b>p: Candidates for DBS vs HC</b> | <b>p: Non-candidates vs HC</b> | <b>p: Candidates for DBS vs Non-candidates</b> | <b>p different trend of change between PD groups</b> | <b>p similar trend of change, with or without difference between PD groups</b> | <b>p different but stable values over time in PD groups</b> |
|--------------------------------------------------|------------------------------|-----------------------------|-----------------------------|------------------------------------|--------------------------------|------------------------------------------------|------------------------------------------------------|--------------------------------------------------------------------------------|-------------------------------------------------------------|
| <b>N</b>                                         | 60                           | 19                          | 41                          |                                    |                                |                                                |                                                      |                                                                                |                                                             |
| <b>Mean absolute cumulative translation [mm]</b> | -0.02 ± 0.19<br>(-0.55-0.72) | 0.04 ± 0.16<br>(-0.18-0.42) | 0.00 ± 0.28<br>(-0.55-1.21) | 0.89                               | 1.00                           | 1.00                                           | 0.96                                                 | 0.84                                                                           | 0.78                                                        |
| <b>Mean rotation [°]</b>                         | 0.00 ± 0.00<br>(0.02-0.01)   | 0.00 ± 0.01<br>(-0.01-0.02) | 0.00 ± 0.01<br>(-0.01-0.03) | 1.00                               | 1.00                           | 1.00                                           | 0.50                                                 | 0.80                                                                           | 0.60                                                        |

Values are reported as mean ± standard deviation (range). Differences between PD groups and healthy controls and between PD groups at baseline were assessed using one-way ANOVA (statistical contrasts). Linear regression models were built to assess longitudinal head motion parameters changes. Head motion parameters were considered as the dependent variable into each model, which also included individual follow-up duration as covariate (independent variable). Abbreviations: Candidates for DBS=Patients eligible for DBS; HC= healthy controls; mm= millimeters; N= number; Non-candidates=Patients not eligible for DBS.

**Supplementary Figure 1. Subnetworks showing altered functional connectivity in patients eligible or not to DBS relative to healthy controls (NBS analysis).** The principal (or largest) connected components are shown in red; other connected components, not included in the principal connected components, are shown in green. Abbreviations: A= anterior; Candidates for DBS= patients eligible for DBS; HC= healthy controls; Non-candidates=Patients not eligible for DBS; L= left; P= posterior; R= right.

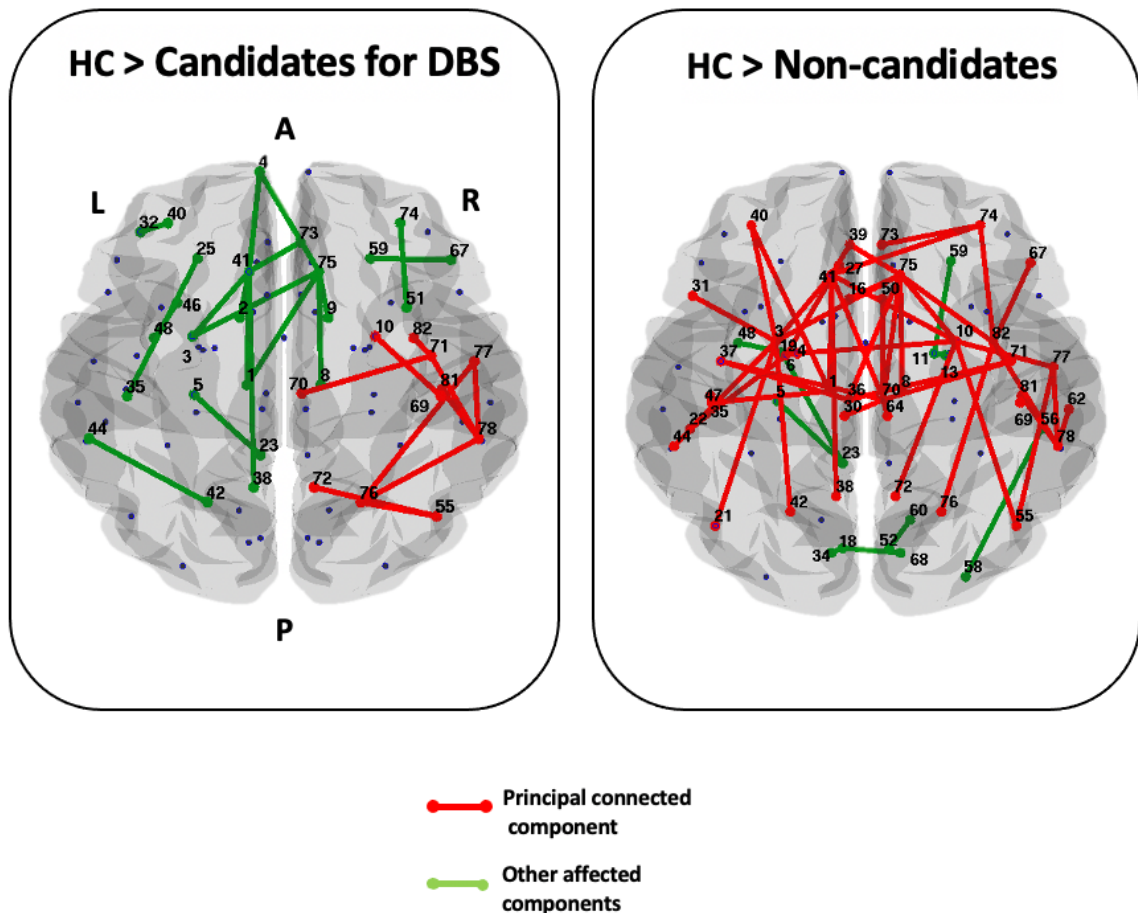

**Supplementary Figure 2. Framework for the selection of Parkinson's disease patients who became candidates for DBS over time.** Once defined the PD cluster of 60 patients according to inclusion and exclusion criteria (Figure 1): **a.** the UPDRS score IV, item 33  $\geq 2$  and item 39  $> 2$ , was used to assess troublesome dyskinesia and severe motor fluctuations, respectively; subsequently, the impairment of motor activities of daily living (UPDRS II  $> 6$ ), the absence of severe dementia and major depression (MDS-Task Force criteria and Hamilton Depression Rating Scale) and the medications were evaluated. Patients were considered eligible for DBS in case of persistent troublesome dyskinesia and/or severe motor fluctuations causing reduced quality of daily living despite medications adjustment (no therapeutic window) over four years of follow up; and/or **b.** the UPDRS score III, item 20 and 21  $\geq 5$ , was used to assess a marked tremor; subsequently, the impairment of motor activities of daily living (UPDRS II  $> 6$ ), the absence of severe dementia and major depression (MDS-Task Force criteria and Hamilton Depression Rating Scale), and the medications were evaluated. Patients were considered eligible for DBS in case of refractory marked tremor impairing the quality of daily living despite medications adjustment (no therapeutic window) over four years. Abbreviations: DBS= deep brain stimulation; LEDD= levodopa equivalent daily dosage; PD= Parkinson's disease; UPDRS= Unified Parkinson's Disease Rating Scale.

a

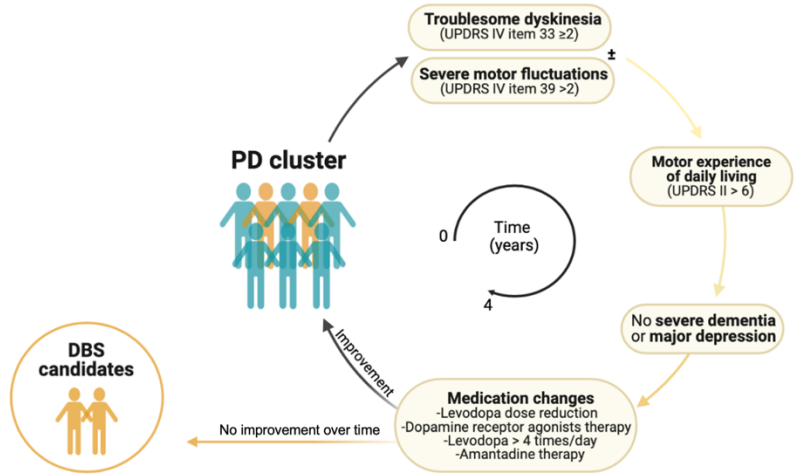

b

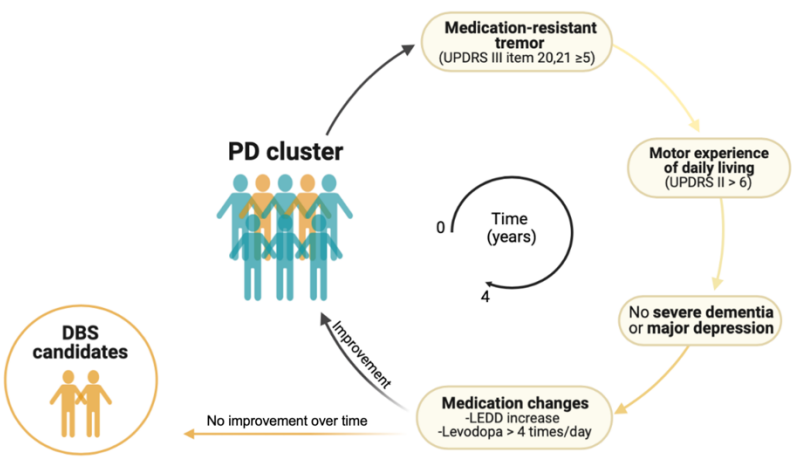

Supplement: 41531_2021_268_MOESM1_ESM.pdf [file 41531_2021_268_MOESM1_ESM.pdf]
