# Supplementary material for: Functional connectivity in Parkinson’s disease candidates for deep brain stimulation
Source: PubMed Central journal article supplement (PMC8748462; doi:10.1038/s41531-021-00268-6), 2022-01-10
Supplement: 41531_2021_268_MOESM2_ESM.pdf [file 41531_2021_268_MOESM2_ESM.pdf]

## Reporting Summary

Nature Portfolio wishes to improve the reproducibility of the work that we publish. This form provides structure for consistency and transparency in reporting. For further information on Nature Portfolio policies, see our [Editorial Policies](#) and the [Editorial Policy Checklist](#).

### Statistics

For all statistical analyses, confirm that the following items are present in the figure legend, table legend, main text, or Methods section.

- | n/a                                 | Confirmed                                                                                                                                                                                                                                                                                      |
|-------------------------------------|------------------------------------------------------------------------------------------------------------------------------------------------------------------------------------------------------------------------------------------------------------------------------------------------|
| <input type="checkbox"/>            | <input checked="" type="checkbox"/> The exact sample size ( $n$ ) for each experimental group/condition, given as a discrete number and unit of measurement                                                                                                                                    |
| <input type="checkbox"/>            | <input checked="" type="checkbox"/> A statement on whether measurements were taken from distinct samples or whether the same sample was measured repeatedly                                                                                                                                    |
| <input type="checkbox"/>            | <input checked="" type="checkbox"/> The statistical test(s) used AND whether they are one- or two-sided<br><i>Only common tests should be described solely by name; describe more complex techniques in the Methods section.</i>                                                               |
| <input type="checkbox"/>            | <input checked="" type="checkbox"/> A description of all covariates tested                                                                                                                                                                                                                     |
| <input type="checkbox"/>            | <input checked="" type="checkbox"/> A description of any assumptions or corrections, such as tests of normality and adjustment for multiple comparisons                                                                                                                                        |
| <input type="checkbox"/>            | <input checked="" type="checkbox"/> A full description of the statistical parameters including central tendency (e.g. means) or other basic estimates (e.g. regression coefficient) AND variation (e.g. standard deviation) or associated estimates of uncertainty (e.g. confidence intervals) |
| <input type="checkbox"/>            | <input checked="" type="checkbox"/> For null hypothesis testing, the test statistic (e.g. $F$ , $t$ , $r$ ) with confidence intervals, effect sizes, degrees of freedom and $P$ value noted<br><i>Give <math>P</math> values as exact values whenever suitable.</i>                            |
| <input checked="" type="checkbox"/> | <input type="checkbox"/> For Bayesian analysis, information on the choice of priors and Markov chain Monte Carlo settings                                                                                                                                                                      |
| <input type="checkbox"/>            | <input checked="" type="checkbox"/> For hierarchical and complex designs, identification of the appropriate level for tests and full reporting of outcomes                                                                                                                                     |
| <input type="checkbox"/>            | <input checked="" type="checkbox"/> Estimates of effect sizes (e.g. Cohen's $d$ , Pearson's $r$ ), indicating how they were calculated                                                                                                                                                         |

*Our web collection on [statistics for biologists](#) contains articles on many of the points above.*

### Software and code

Policy information about [availability of computer code](#)

Data collection

Data analysis

For manuscripts utilizing custom algorithms or software that are central to the research but not yet described in published literature, software must be made available to editors and reviewers. We strongly encourage code deposition in a community repository (e.g. GitHub). See the Nature Portfolio [guidelines for submitting code & software](#) for further information.

### Data

Policy information about [availability of data](#)

All manuscripts must include a [data availability statement](#). This statement should provide the following information, where applicable:

- Accession codes, unique identifiers, or web links for publicly available datasets
- A description of any restrictions on data availability
- For clinical datasets or third party data, please ensure that the statement adheres to our [policy](#)

The dataset used and analyzed during the current study will be made available by the corresponding author upon request to qualified researchers (i.e., affiliated to a university or research institution/hospital).

## Field-specific reporting

Please select the one below that is the best fit for your research. If you are not sure, read the appropriate sections before making your selection.

Life sciences  Behavioural & social sciences  Ecological, evolutionary & environmental sciences

For a reference copy of the document with all sections, see [nature.com/documents/nr-reporting-summary-flat.pdf](https://www.nature.com/documents/nr-reporting-summary-flat.pdf)

## Life sciences study design

All studies must disclose on these points even when the disclosure is negative.

|                 |                                                                                                                                                                                                                                                                                                                                                                       |
|-----------------|-----------------------------------------------------------------------------------------------------------------------------------------------------------------------------------------------------------------------------------------------------------------------------------------------------------------------------------------------------------------------|
| Sample size     | 154 patients with idiopathic Parkinson's disease were prospectively recruited. According to the reported inclusion and exclusion criteria, 60 patients were enrolled in the study (19 candidates and 41 not candidates for DBS over time). 60 age- and sex-matched healthy controls without any neurological disorders and psychiatric disorders were also recruited. |
| Data exclusions | Patients with incomplete MRI or clinical data were excluded.                                                                                                                                                                                                                                                                                                          |
| Replication     | We confirmed the replication of data.                                                                                                                                                                                                                                                                                                                                 |
| Randomization   | N/A                                                                                                                                                                                                                                                                                                                                                                   |
| Blinding        | N/A                                                                                                                                                                                                                                                                                                                                                                   |

## Reporting for specific materials, systems and methods

We require information from authors about some types of materials, experimental systems and methods used in many studies. Here, indicate whether each material, system or method listed is relevant to your study. If you are not sure if a list item applies to your research, read the appropriate section before selecting a response.

### Materials & experimental systems

|                                     |                                                                 |
|-------------------------------------|-----------------------------------------------------------------|
| n/a                                 | Involved in the study                                           |
| <input checked="" type="checkbox"/> | <input type="checkbox"/> Antibodies                             |
| <input checked="" type="checkbox"/> | <input type="checkbox"/> Eukaryotic cell lines                  |
| <input checked="" type="checkbox"/> | <input type="checkbox"/> Palaeontology and archaeology          |
| <input checked="" type="checkbox"/> | <input type="checkbox"/> Animals and other organisms            |
| <input type="checkbox"/>            | <input checked="" type="checkbox"/> Human research participants |
| <input checked="" type="checkbox"/> | <input type="checkbox"/> Clinical data                          |
| <input checked="" type="checkbox"/> | <input type="checkbox"/> Dual use research of concern           |

### Methods

|                                     |                                                            |
|-------------------------------------|------------------------------------------------------------|
| n/a                                 | Involved in the study                                      |
| <input checked="" type="checkbox"/> | <input type="checkbox"/> ChIP-seq                          |
| <input checked="" type="checkbox"/> | <input type="checkbox"/> Flow cytometry                    |
| <input type="checkbox"/>            | <input checked="" type="checkbox"/> MRI-based neuroimaging |

## Human research participants

Policy information about [studies involving human research participants](#)

|                            |                                                                                                                                                          |
|----------------------------|----------------------------------------------------------------------------------------------------------------------------------------------------------|
| Population characteristics | Epidemiological and clinical features of the enrolled subjects are detailed in the main text and tables                                                  |
| Recruitment                | Idiopathic Parkinson's disease patients who were prospectively recruited at the Clinic of Neurology, Faculty of Medicine, University of Belgrade, Serbia |
| Ethics oversight           | The study received approval from the ethics committee on human experimentation of Faculty of Medicine - University of Belgrade (No. 175090)              |

Note that full information on the approval of the study protocol must also be provided in the manuscript.

## Magnetic resonance imaging

### Experimental design

|                                 |                                                                                                                                                                                  |
|---------------------------------|----------------------------------------------------------------------------------------------------------------------------------------------------------------------------------|
| Design type                     | Resting-state fMRI                                                                                                                                                               |
| Design specifications           | Total scan time was about 90-120 min for each subject. The MRI sequences are reported in the main text.                                                                          |
| Behavioral performance measures | Neuropsychological and behavioral evaluations were performed at each visit in both Parkinson's disease patients and healthy controls. Their tests are reported in the main text. |

## Acquisition

|                               |                                                                                                                                                                                                                                                                                                                                                                                                                                                                                                                                                                                                                                                                                                                                                                                               |
|-------------------------------|-----------------------------------------------------------------------------------------------------------------------------------------------------------------------------------------------------------------------------------------------------------------------------------------------------------------------------------------------------------------------------------------------------------------------------------------------------------------------------------------------------------------------------------------------------------------------------------------------------------------------------------------------------------------------------------------------------------------------------------------------------------------------------------------------|
| Imaging type(s)               | Structural and functional MRI                                                                                                                                                                                                                                                                                                                                                                                                                                                                                                                                                                                                                                                                                                                                                                 |
| Field strength                | 1.5 T                                                                                                                                                                                                                                                                                                                                                                                                                                                                                                                                                                                                                                                                                                                                                                                         |
| Sequence & imaging parameters | Dual-Echo Turbo Spin-Echo (repetition time [TR]=3125 ms, echo time [TEs]=20/100 ms, echo train length [ETL]=6,44 axial slices, thickness=3.0 mm, matrix size =256×247, field of view [FOV]=240×232 mm <sup>2</sup> ; voxel size=0.94×0.94×3 mm, in-plane sensitivity encoding [SENSE] parallel reduction factor, 1.5);<br>Three-dimensional (3D) sagittal T1-weighted Turbo-Field-Echo (TR=7.1 ms, TE=3.3 ms, inversion time=1000 ms, flip angle=8°, matrix size=256×256×180, FOV=256×256 mm <sup>2</sup> , section thickness=1 mm, voxel size=1×1×1 mm);<br>Gradient-echo echo planar imaging for RS-fMRI (TR=3000 ms, TE=35 ms, flip angle=90°, matrix size=128×128, FOV=240×240 mm <sup>2</sup> , voxel size=1.88×1.88×4 mm, slice thickness=4 mm, 200 sets of 30 contiguous axial slices) |
| Area of acquisition           | Whole brain scan was performed                                                                                                                                                                                                                                                                                                                                                                                                                                                                                                                                                                                                                                                                                                                                                                |
| Diffusion MRI                 | <input type="checkbox"/> Used <input checked="" type="checkbox"/> Not used                                                                                                                                                                                                                                                                                                                                                                                                                                                                                                                                                                                                                                                                                                                    |

## Preprocessing

|                            |                                                                                                                                                                                                                                                                                                                                                                                               |
|----------------------------|-----------------------------------------------------------------------------------------------------------------------------------------------------------------------------------------------------------------------------------------------------------------------------------------------------------------------------------------------------------------------------------------------|
| Preprocessing software     | T1-weighted images were processed and parcellated using the Freesurfer suite (V 5.3 <a href="http://surfer.nmr.mgh.harvard.edu/">http://surfer.nmr.mgh.harvard.edu/</a> ), resulting in 83 areas, which were used to define the brain nodes for the network analysis.<br>RS-fMRI data processing was carried out using the FMRIB software library (FSLv5.0). It is reported in the main text. |
| Normalization              | T1-weighted images were skull stripped using the Brain Extraction Tool and segmented in GM, WM, and cerebrospinal fluid (CSF) maps using the FMRIB's Automated Segmentation Tool. Resulting images were registered into the RS-fMRI native space of each subject through a 7 degree-of freedom (DOF) linear affine transformation using FMRIB's Linear Image Registration Tool.               |
| Normalization template     | N/A                                                                                                                                                                                                                                                                                                                                                                                           |
| Noise and artifact removal | The following FSL-standard preprocessing pipeline was applied: (1) motion correction using MCFLIRT; (2) high-pass temporal filtering (lower frequency: 0.01 Hz); (3) spatial smoothing (Gaussian Kernel of FWHM 6 mm); (4) single-session independent component analysis (ICA).                                                                                                               |
| Volume censoring           | The first four volumes of the fMRI data were removed to reach complete magnet signal stabilization.                                                                                                                                                                                                                                                                                           |

## Statistical modeling & inference

|                                                                           |                                                                                                                                                                                                                                                                                                                                                                                                                                                                                                                                                                   |
|---------------------------------------------------------------------------|-------------------------------------------------------------------------------------------------------------------------------------------------------------------------------------------------------------------------------------------------------------------------------------------------------------------------------------------------------------------------------------------------------------------------------------------------------------------------------------------------------------------------------------------------------------------|
| Model type and settings                                                   | Baseline and longitudinal MRI analysis (graph analysis and Network-Based Statistics) and correlation analysis between baseline fMRI metrics and baseline/longitudinal clinical scales.                                                                                                                                                                                                                                                                                                                                                                            |
| Effect(s) tested                                                          | Baseline MRI analysis: global and lobar network topological metrics were compared between groups using ANOVA models; NBS analysis compared functional connectivity between groups using ANOVA models.<br>Longitudinal MRI analysis: changes over time of the functional network metrics were assessed with general linear models using time as a continuous variable.<br>Correlation analysis: partial correlations were assessed between baseline fMRI metrics and baseline/longitudinal clinical scales using Pearson's correlation coefficient ( $p < 0.05$ ). |
| Specify type of analysis:                                                 | <input checked="" type="checkbox"/> Whole brain <input type="checkbox"/> ROI-based <input type="checkbox"/> Both                                                                                                                                                                                                                                                                                                                                                                                                                                                  |
| Statistic type for inference<br>(See <a href="#">Eklund et al. 2016</a> ) | Graph analysis and NBS                                                                                                                                                                                                                                                                                                                                                                                                                                                                                                                                            |
| Correction                                                                | Bonferroni correction                                                                                                                                                                                                                                                                                                                                                                                                                                                                                                                                             |

## Models & analysis

|                                          |                                                                                                    |
|------------------------------------------|----------------------------------------------------------------------------------------------------|
| n/a                                      | Involvement in the study                                                                           |
| <input type="checkbox"/>                 | <input checked="" type="checkbox"/> Functional and/or effective connectivity                       |
| <input type="checkbox"/>                 | <input checked="" type="checkbox"/> Graph analysis                                                 |
| <input checked="" type="checkbox"/>      | <input type="checkbox"/> Multivariate modeling or predictive analysis                              |
| Functional and/or effective connectivity | NBS was used to evaluate functional connectivity changes at baseline and over time between groups. |
| Graph analysis                           | Nodal strength, Path length, Local efficiency and Clustering coefficient.                          |
